# Supplementary material for: Complex lattice occupation of copper leading to enhanced thermoelectric performance in n-type PbSe
Source: Royal Society of Chemistry journal article supplement (doi:10.1039/d4ta05201c), 2024-01-01
Supplement: d4ta05201c1.pdf [file d4ta05201c1.pdf]

## Supplementary Information

### Complex lattice occupations of copper leading to enhanced thermoelectric performance in *n*-type PbSe

Yalin Shi,<sup>‡a</sup> Mingkai He,<sup>‡b</sup> Minchao Cui,<sup>\*c</sup> Weishuai Wang,<sup>a</sup> Baopeng Ma,<sup>ad</sup> Fudong Zhang,<sup>a</sup>  
BeiQuan Jia,<sup>a</sup> Xiaolian Chao,<sup>a</sup> Zupei Yang,<sup>\*a</sup> Di Wu<sup>\*a</sup>

<sup>a</sup> Key Laboratory for Macromolecular Science of Shaanxi Province and Shaanxi Key Laboratory for Advanced Energy Devices, School of Materials Science and Engineering, Shaanxi Normal University, Xi'an 710062, China

**E-mail:** yangzp@snnu.edu.cn, wud@snnu.edu.cn

<sup>b</sup> Beijing Institute of Nanoenergy and Nanosystems, Chinese Academy of Sciences, Beijing 101400, China

<sup>c</sup> Key Laboratory of High Performance Manufacturing for Aero Engine (MIIT) Northwestern Polytechnical University, Xi'an 710072, China

**E-mail:** cuiminchao@nwpu.edu.cn

<sup>d</sup> School of Materials Science and Engineering and Institute of Materials Genome & Big Data, Harbin Institute of Technology, Shenzhen, 518055, China.

## 1. Experiments

### *Sample synthesis*

All samples were prepared by high-temperature melting combined with spark plasma sintering technology. For the samples of composition  $\text{PbSe-}x\%\text{Cu}$  ( $x = 0, 0.2, 0.4, 0.6, 0.8$  and  $1.0$ ),  $\text{PbSe-}y\%\text{Cu}_2\text{Se}$  ( $y = 0, 0.5, 1.0, 2.0, 3.0, 5.0$ ),  $\text{PbSe-}3\%\text{Cu}_2\text{Se-}z\%\text{Cu}$  ( $z = 0, 0.4, 0.6, 0.8, 1.0$ ), high-purity raw materials Pb, Se and Cu particles (99.999%, Alfa Aesar, China) were weighed according to stoichiometric ratio and encapsulated into quartz tubes under the residual pressure less than  $\sim 10^{-4}$  torr. Then the quartz tubes were placed into muffle furnaces and slowly heated to 450K within 12h, rapidly heated to 1150K in 6 h, kept for 6 h at this temperature and then naturally cooling. Afterwards, the obtained ingots were grinded into powder and then sintered with spark plasma sintering. All samples possessed the same sintering procedure: firstly, the powder was heated to 500°C at a rate of 100K/min, then slowly heated to 550°C within 1 min and then soaked for 5 minutes with an axial pressure of 50 MPa. The obtained pellets were cut into the bar-shaped pieces of 12×3×3 mm for electrical transport measurements and a squared shape of 6×6×1.8 mm for thermal diffusivity measurements.

### *Thermoelectric properties*

The electrical conductivity and the Seebeck coefficient of obtained samples were measured simultaneously by a commercial ZEM-3 (Ultravac, Japan) instrument under a low-pressure Helium atmosphere from room temperature to 773 K. The experimental error for each measurement was expected to be within 5%. The thermal conductivity is calculated from the relationship  $\kappa_{\text{tot}} = D\rho C_p$ , where the thermal diffusivity ( $D$ ) was calculated in N<sub>2</sub> Laser Flash Diffusion Method LFA 467 (Netzsch, Germany) in the temperature range 298K to 773K. The heat capacity ( $C_p$ ) was calculated from the Dulong-Petit limit law of theory  $3NR/M$ , where  $M$  is the average atomic mass per mole. Sample density ( $\rho$ ) was measured using the Archimedes method. The lattice thermal conductivity ( $\kappa_{\text{lat}}$ ) was calculated by subtracting the electronic thermal conductivity ( $\kappa_{\text{ele}}$ ), where is related to the electrical conductivity.

### *Phase and Microstructure Characterizations*

X-ray diffraction (PXRD) patterns were recorded from finely ground powders of samples using a XRD diffractor (Rigaku, Japan, Cu-K<sub>α</sub>) with radiation operating at 40 kV and 20 mA. The scanning range of  $2\theta$  was 20-80° with a scanning speed of 6°/min. Scanning electron

microscope (SEM, SUB8020, Japan) equipped with energy dispersive spectroscopy (EDS) was used to detect its microstructure and corresponding elements distribution at micron-scale level. A FEI Themis Z was used to for the TEM analysis under a voltage of 300 kV.

### **Hall measurements**

The room-temperature carrier concentration was measured using the Van Der Pauw method using a commercial instrument (Lake Shore 8400 series, 58 USA).

## **2. Theoretical simulations/calculations**

### **Debye-Callaway model**

Using the Debye-Callaway model, the final temperature ( $T$ )-dependent can be expressed as a sum  $\kappa_{\text{lat}}(T)$  of the spectral lattice thermal conductivity from different frequencies:

$$\kappa_{\text{lat}} = \int \kappa_s(\omega) d\omega = \frac{1}{3} \int_0^{\omega_a} C_s(\omega) v_g(\omega)^2 \tau_{\text{tot}}(\omega) d\omega \quad (1)$$

Thus, the  $\kappa_s(\omega)$  is determined by the  $C_s(\omega)$ , the frequency-dependent phonon group velocity  $v_g(\omega)$  and total relaxation time  $\tau_{\text{tot}}(\omega)$ . Generally, as the phonons in optical branches shows low velocity, only the phonons in acoustic branches are considered to calculate the  $\kappa_{\text{lat}}$ . Thus, the

cut-off frequency for acoustic branches  $\omega_a$  is given by  $\omega_a = \left(\frac{6\pi^2}{V_{\text{cell}}}\right)^{1/3} v_s = \left(\frac{6\pi^2}{NV_{\text{av}}}\right)^{1/3} v_s$  where  $N$ ,  $V_{\text{av}}$  and  $v_s$  the atomic numbers in a primitive cell, average atomic volume and sound speed respectively. For simple approximation, the frequency-dependent phonon group velocity  $v_g(\omega)$  is set as a constant value  $v_s$ , and  $\kappa_{\text{lat}}$  is calculated by the following equation (2):

$$\kappa_{\text{lat}} = \frac{k_B}{2\pi^2 v_s} \left(\frac{k_B}{h}\right) \int_0^{\theta a/T} \tau_{\text{tot}}(x) \frac{x^4 e^x}{(e^x - 1)^2} dx \quad (2)$$

$$\theta a = \hbar \omega a / k_B = \left(\frac{6\pi^2}{NV_{\text{av}}}\right)^{1/3} \hbar v_s / k_B \quad (3)$$

The dimensionless variable  $x$  in equation (2) is defined as  $x = \hbar \omega / k_B T$ , where  $\omega$  is the phonon frequency. The  $\tau_{\text{tot}}(x)$  is the reciprocal sum of the relaxation times from different scattering mechanisms according to the Matthiessen's rule:

$$\tau = \tau_U^{-1} + \tau_N^{-1} + \tau_{PD}^{-1} + \tau_B^{-1} + \tau_{NP}^{-1} + \tau_{DC}^{-1} + \tau_{DS}^{-1} \quad (4)$$

where,  $\tau_U^{-1}$ ,  $\tau_N^{-1}$ ,  $\tau_{PD}^{-1}$ ,  $\tau_B^{-1}$  and  $\tau_{NP}^{-1}$  are the contributions from the Umklapp phonon-phonon scattering, normal phonon-phonon scattering, point-defect scattering, boundary scattering,

nanoprecipitates scattering and dislocation scattering.

The  $\tau_U^{-1}$  is calculated from the following equation:

$$\tau_U^{-1} = \frac{2k_B^3 V_{av}^{1/3} \gamma^2 T^3}{(6\pi^2)^{1/3} M_{av} v_s^3 \hbar^2} x^2 \exp\left(-\frac{\theta_a}{bT}\right) \quad (5)$$

The  $\tau_N^{-1}$  is calculated from the following equation:

$$\tau_N^{-1} = B_N \tau_U^{-1} \quad (6)$$

The  $\tau_{PD}^{-1}$  is calculated from the following equation:

$$\tau_{PD}^{-1} = \frac{V_{av} \Gamma}{4\pi v_s^3} \omega^4 = \frac{V_{av} \Gamma}{4\pi v_s^3} \left(\frac{k_B T}{\hbar}\right)^4 x^4 \quad (7)$$

The  $\tau_B^{-1}$  is calculated from the following equation:

$$\tau_B^{-1} = \frac{vS}{D} \quad (8)$$

The  $\tau_{NP}^{-1}$  is calculated from the following equation:

$$\tau_{NP}^{-1} = v_s \left[ \left(2\pi R_{NP}^2\right)^{-1} + \left( \pi R_{NP}^2 \frac{4}{9} \left(\frac{\Delta\rho}{\rho}\right)^2 \left(\frac{xk_B T R_{NP}}{\hbar v_s}\right)^4 \right)^{-1} \right]^{-1} N_{NP} \quad (9)$$

Dislocation scattering that includes both dislocation core ( $\tau_{DC}^{-1}$ ) and dislocation strain ( $\tau_{DS}^{-1}$ ) scattering.

$$\tau_{DC}^{-1} = N_D \frac{V_s^{4/3}}{v_s^2} \omega^3 \quad (10)$$

$$\tau_{DS}^{-1} = A' N_D \gamma^2 B_D^2 \omega \left\{ \frac{1}{2} + \frac{1}{24} \left(\frac{1-2v_s}{1-v_s}\right)^2 \left[ 1 + \sqrt{2} \left(\frac{v_L}{v_T}\right)^2 \right]^2 \right\} \quad (11)$$

Detailed parameters are shown in Table S2.

### **Density functional theory calculations**

Density functional theory calculations were performed using the projector augmented wave (PAW) method, as implemented in the Vienna Ab initio Simulation Package (VASP)<sup>1-2</sup>, with the Perdew, Burke, and Ernzerhof (PBE)<sup>3</sup> generalized gradient approximation (GGA) utilized for the exchange-correlation energy functional. A 2×2×3 supercell of PbSe (60 atoms) is adopted. The pristine PbSe, and Cu doped cell (PbSeCu) are fully relaxed individually with A 8×8×4  $\Gamma$ -centered Monkhorst-Pack k-point mesh and a plane-wave cutoff energy of 450 eV

until the forces on atoms were smaller than  $1 \times 10^{-2}$  eV/Å. The energy convergence criterion of  $10^{-6}$  eV were employed for all calculations. The van der Waals interaction is taken into account in DFT-D2 method as implemented in VASP. In the calculation of density of state (DOS), a denser k-point mesh ( $10 \times 10 \times 6$ ) is adopted.

For the calculations of charged defect formation energy, we used the following formula:

$$E_f = E(\text{defect}, q) - E(\text{pure}) - \sum_i n_i \mu_i + q (E_V + E_F + \Delta V)$$

$E(\text{defect}, q)$  and  $E(\text{pure})$  are the total energies of unit cells with and without defect separately.

$n_i \mu_i$  is the reference energy of  $n_i$  added atoms of element  $i$  with chemical potential  $\mu_i$ .  $E_V$  is the

valence band maximum,  $E_F$  is the Fermi level position, and  $\Delta V$  is the core level correction.

### 3. Supplementary Figures

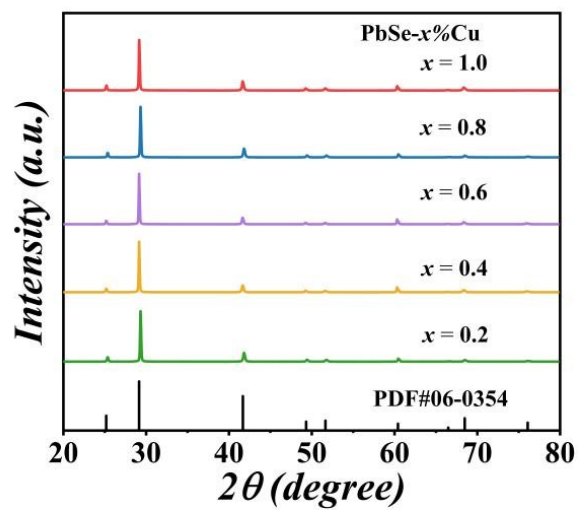

**Figure S1.** The powder X-ray diffraction patterns for the  $\text{PbSe-}x\%\text{Cu}$  ( $x = 0.2, 0.4, 0.6, 0.8, 1.0$ ) samples.

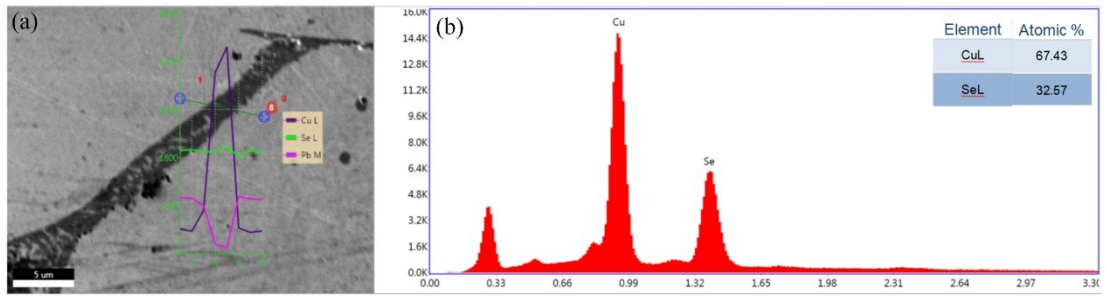

**Figure S2.** The line scan for the PbSe-4%Cu<sub>2</sub>Se samples.

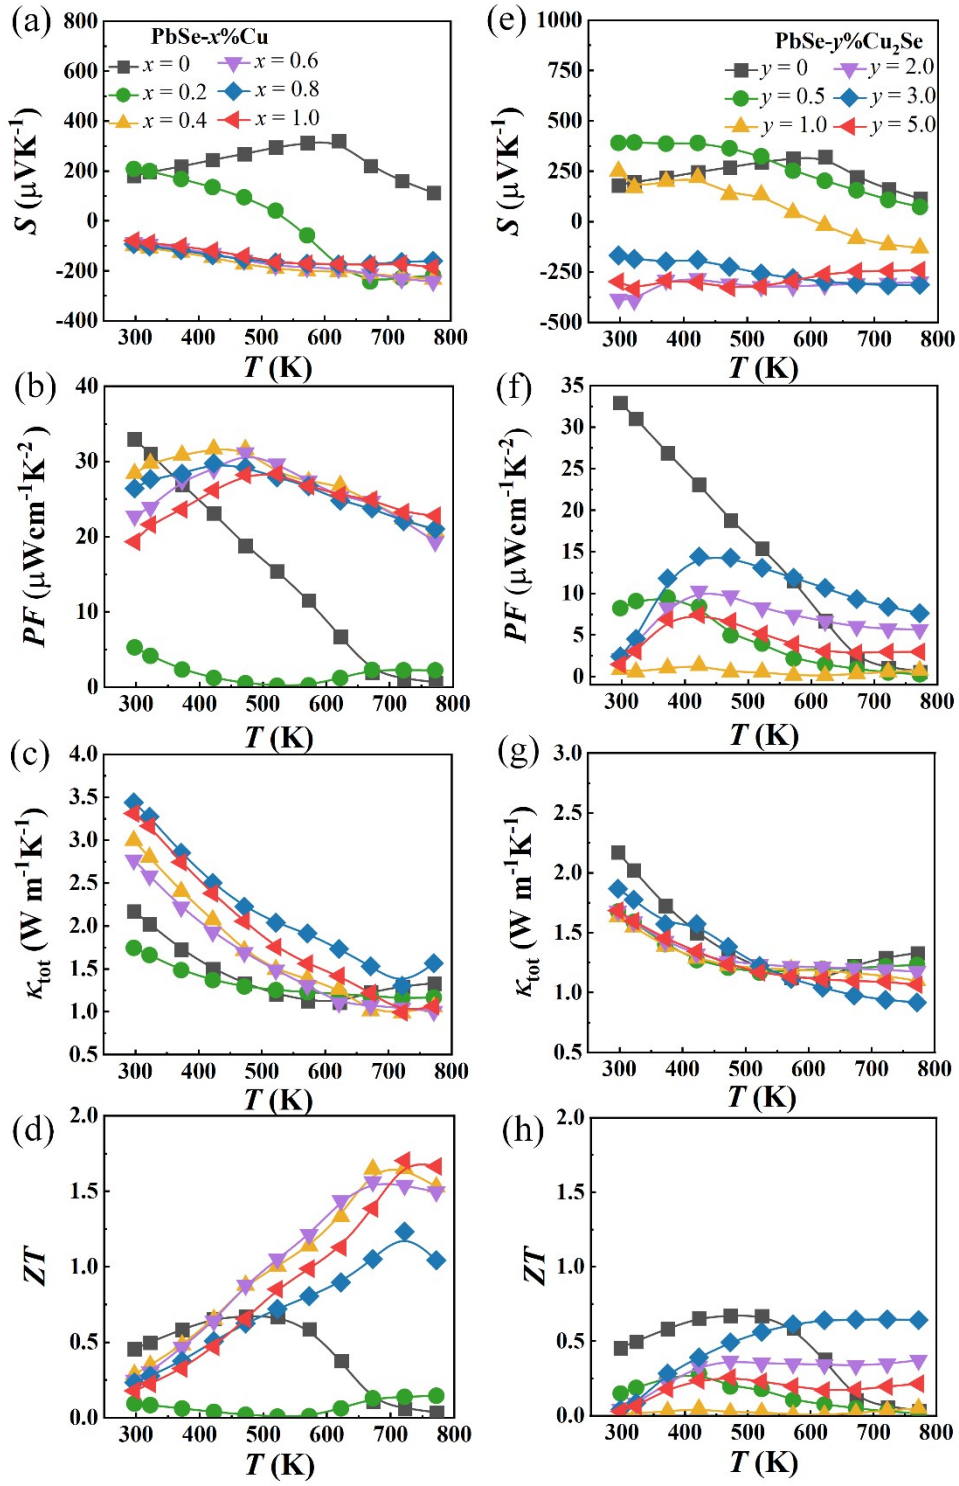

**Figure S3.** Temperature-dependent thermoelectric properties of PbSe- $x\%$ Cu ( $x = 0, 0.2, 0.4, 0.6, 0.8, 1.0$ ): (a) Seebeck coefficient; (b) power factor; (c) total thermal conductivity; (d)  $ZT$  values. Temperature-dependent thermoelectric transport properties in PbSe- $y\%$ Cu<sub>2</sub>Se ( $y = 0, 0.5, 1.0, 2.0, 3.0, 5.0$ ): (e) Seebeck coefficient; (f) power factor; (g) total thermal conductivity; (h)  $ZT$  values



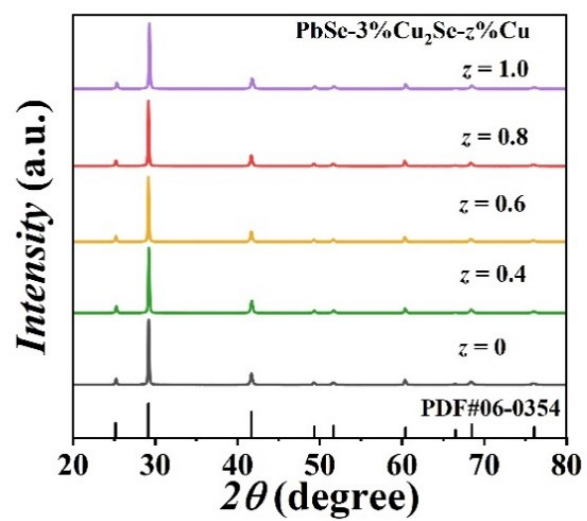

**Figure S4.** The powder X-ray diffraction patterns for the  $\text{PbSe-3\%Cu}_2\text{Se-}z\%\text{Cu}$  ( $z = 0, 0.4, 0.6, 0.8, 1.0$ ) samples.

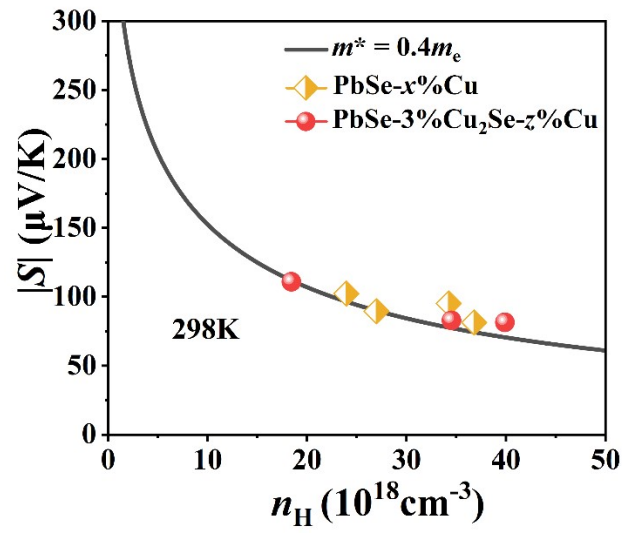

**Figure S5.** Calculated Pisarenko line using SPB model<sup>4</sup> versus data of  $\text{PbSe-}x\%\text{Cu}$  ( $x = 0.4, 0.6, 0.8, 1.0$ ) and  $\text{PbSe-}3\%\text{Cu}_2\text{Se-}z\%\text{Cu}$  ( $z = 0.6, 0.8, 1.0$ ) samples.

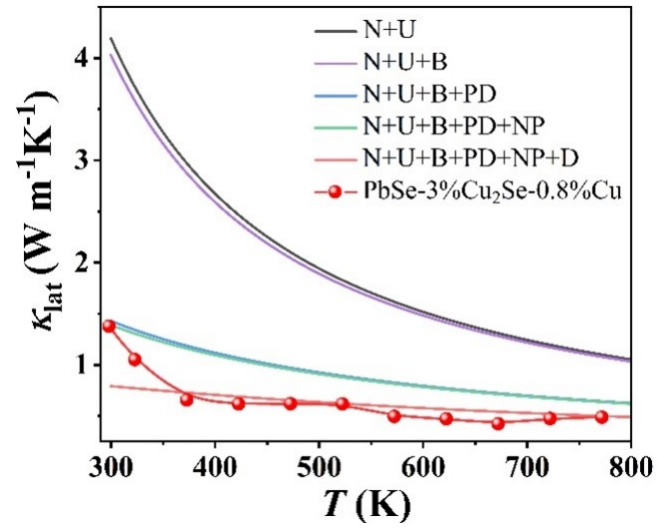

**Figure S6.** Fitting of temperature-dependent lattice thermal conductivity  $\kappa_{\text{lat}}$  of the PbSe-3%Cu<sub>2</sub>Se-0.8%Cu sample using Debye-Callaway model by considering Umklapp phonon-phonon scattering (*U*), normal phonon-phonon scattering (*N*), boundary scattering (*B*), point defect scattering (*PD*), nanoprecipitates (*NP*) and dislocation (*D*) processes.

### 3. Supplementary Tables

**Table S1.** Dopant concentrations and corresponding carrier densities for PbSe-3%Cu<sub>2</sub>Se-z%Cu at room temperature.

| <b>PbSe-3%Cu<sub>2</sub>Se-z%Cu</b>               |          |            |            |            |
|---------------------------------------------------|----------|------------|------------|------------|
| <b><i>z</i></b>                                   | <b>0</b> | <b>0.6</b> | <b>0.8</b> | <b>1.0</b> |
| <b><i>n</i> (10<sup>18</sup> cm<sup>-3</sup>)</b> | 0.214    | 18.469     | 34.602     | 39.973     |

**Table S2.** Parameters for the Debye-Callaway model.

| <b>Paramaters</b>                                                        | <b>symbol</b> | <b>values</b>             | <b>Ref</b>  |
|--------------------------------------------------------------------------|---------------|---------------------------|-------------|
| Average atomic mass (kg)                                                 | $M_{av}$      | $2.37556 \times 10^{-25}$ | experiments |
| Average atomic mass volume(kg)                                           | $V_{av}$      | $2.87229 \times 10^{-29}$ | experiments |
| Boltzmann constant (J/K)                                                 | $k_B$         | $1.38 \times 10^{-23}$    | /           |
| Grüneisen parameter                                                      | $\gamma$      | 1.7393                    | 5           |
| Average sound velocity (m/s)                                             | $v_s$         | 2335.4                    | 6           |
| Longitudinal velocity (m/s)                                              | $v_L$         | 3150                      | 6           |
| Transverse velocity (m/s)                                                | $v_T$         | 1700                      | 6           |
| Debye temperature (K)                                                    | $\theta_a$    | 180.2                     | experiments |
| Umklapp to normal ratio                                                  | $B_N$         | 4                         | 7           |
| Pre-factor for dislocation scattering                                    | $A'$          | 0.96                      | 8           |
| Poisson ratio                                                            | $r$           | 0.243                     | 7           |
| Phenomenological parameter                                               | $\varepsilon$ | 64                        | 9           |
| Burgers vector (m)                                                       | $B_D$         | $4.33 \times 10^{-10}$    | 6           |
| Dislocation density(m <sup>-2</sup> )                                    | $N_D$         | $4 \times 10^{11}$        | experiments |
| Number density of nano-precipitates (m <sup>-3</sup> )                   | $N_{NP}$      | $2.8 \times 10^{18}$      | experiments |
| Radius for the nano-precipitates (m)                                     | $R_{NP}$      | $104.4031 \times 10^{-9}$ | experiments |
| Matrix density (g·cm <sup>-3</sup> )                                     | $\rho$        | 8.2                       | experiments |
| Density difference between matrix and precipitates (g·cm <sup>-3</sup> ) | $\Delta\rho$  | 0.7                       | experiments |
| Characteristic of the vibrational                                        | $b$           | 0.9                       | /           |
| Grain size (m)                                                           | D             | $4 \times 10^{-6}$        | experiments |
| Disorder scattering parameter                                            | $\Gamma$      | 0.200830266               | experiments |

## References

1. B. Jia, Y. Huang, Y. Wang, Y. Zhou, X. Zhao, S. Ning, X. Xu, P. Lin, Z. Chen, B. Jiang and J. He, *Energy Environ. Sci.*, 2022, **15**, 1920-1929.
2. G. Kresse and D. Joubert, *Phys. Rev. B*, 1999, **59**, 1758.
3. J. Sun, R. Wang, W. Cui, S. Xie, T. Luo, H. Bai, X. Zhao, Z. Chen, X. Sang, X. Tan, X. Tang and G. Tan, *Chem. Mater.* 2022, **34**, 6450-6459.
4. R. Marlow, S. Kuriyakose, N. Mesaros, H. H. Han, R. Tomlinson, S. N. Faust, M. D. Snape and A. J. Pollard, A. Finn, *Vaccine* 2018, **36**, 2300-2306.
5. J. Sun, C. Xie, W. Cui, F. Yan, J. Li, J. Zhang, X. Sang, X. Tang and G. Tan, *Chem. Mater.*, 2023, **35**, 4366-4374.
6. Z. Chen, B. Ge, W. Li, S. Lin, J. Shen, Y. Chang, R. Hanus, G. J. Snyder and Y. Pei, *Nat. Commun.*, 2017, **8**, 13828.
7. H. Wang, Y. Pei, A. D. LaLonde and G. J. Snyder, *Proc. Natl. Acad. Sci.*, 2012, **109**, 9705-9709.
8. W. R. G. Kemp, P. G. Klemens and R. J. Tainsh, *Philos. Mag.*, 1959, **4**, 845-857.
9. H. Wang, J. Wang, X. Cao and G. J. Snyder, *J. Mater. Chem. A*, 2014, **2**, 3169-3174.
